# Supplementary figures and images for: Viscoelastic tribopairs in dry and lubricated sliding friction
Source: Royal Society of Chemistry journal article supplement (doi:10.1039/d0sm00516a), 2020-01-01

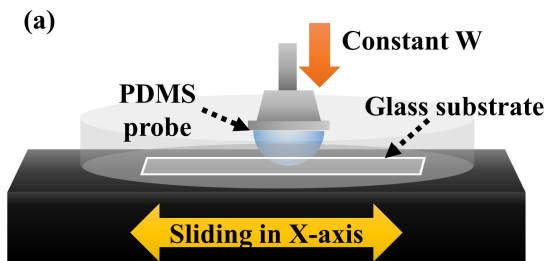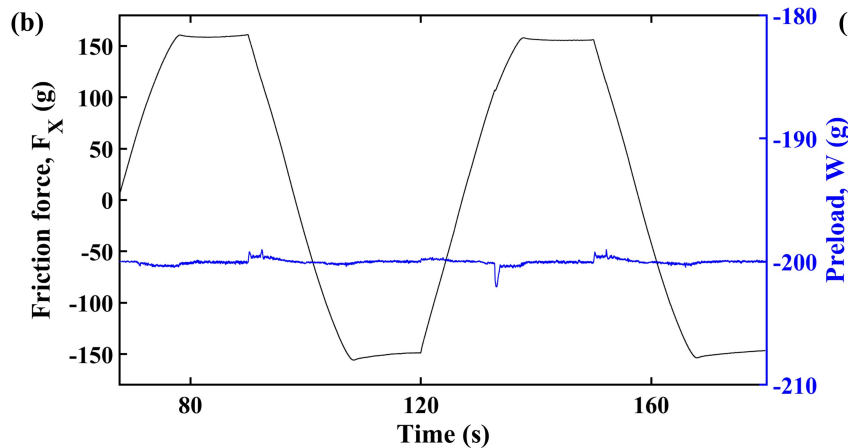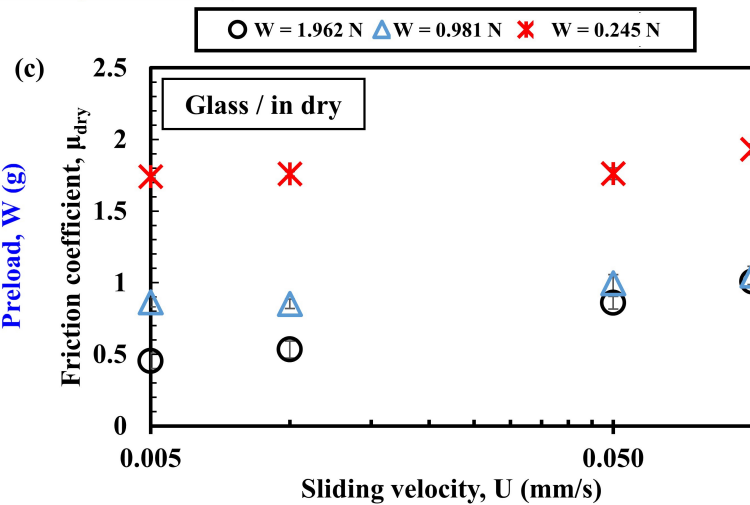

Supplement: d0sm00516a3.pdf [file d0sm00516a3.pdf]

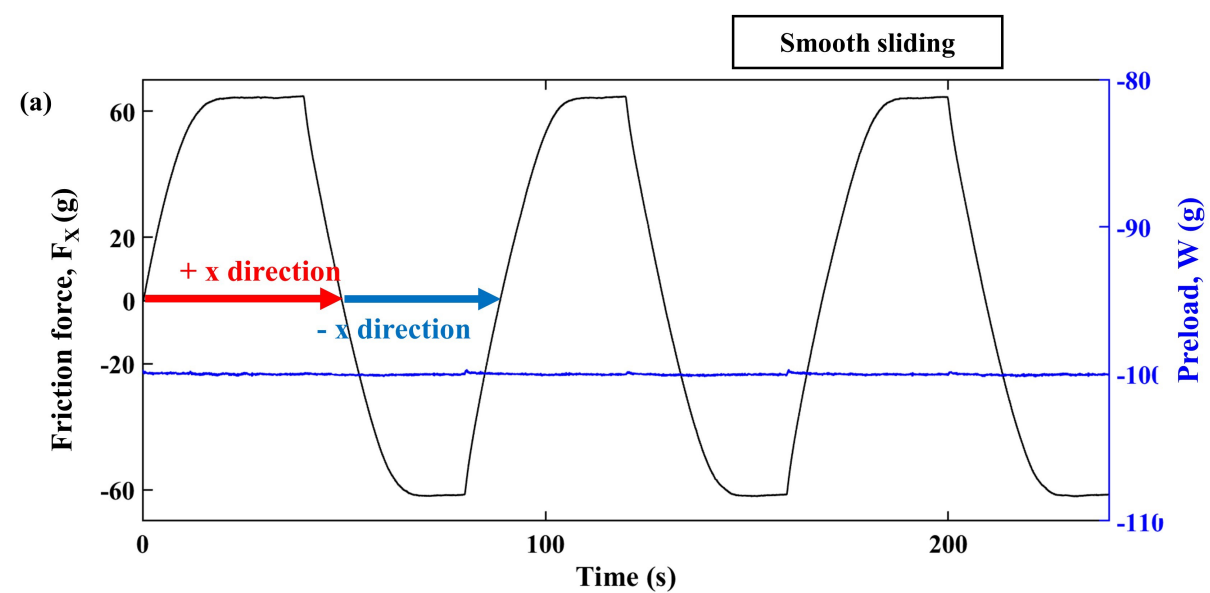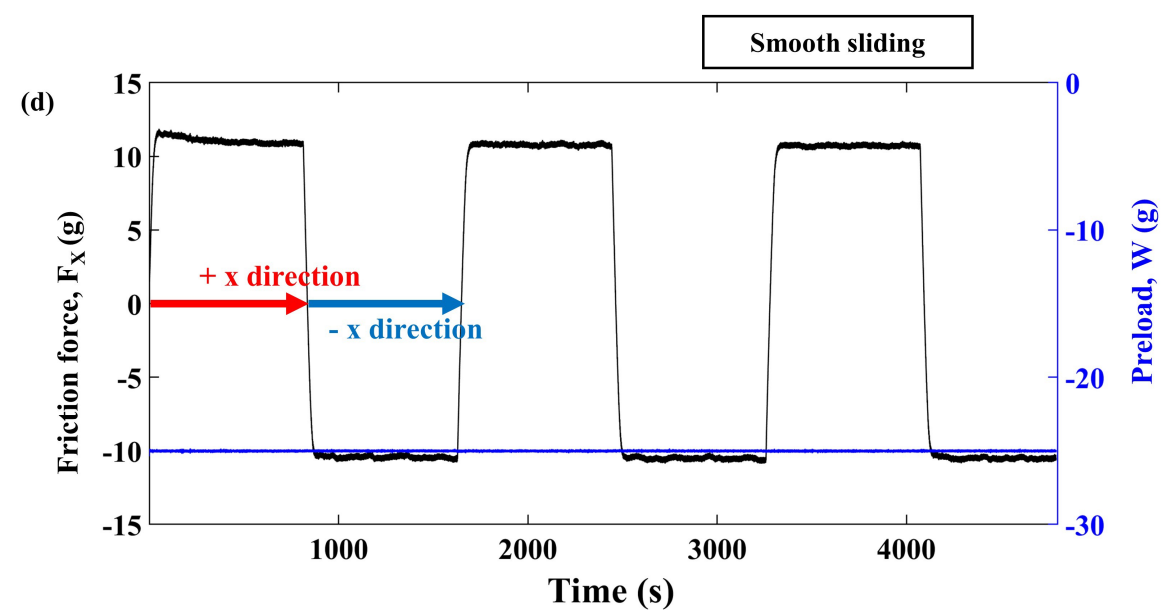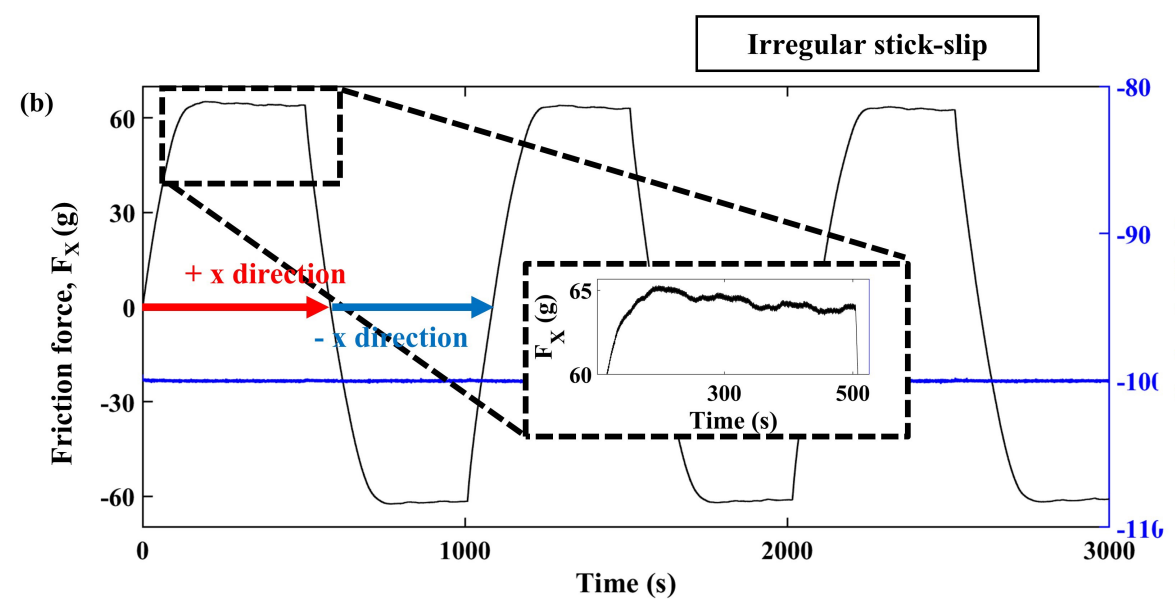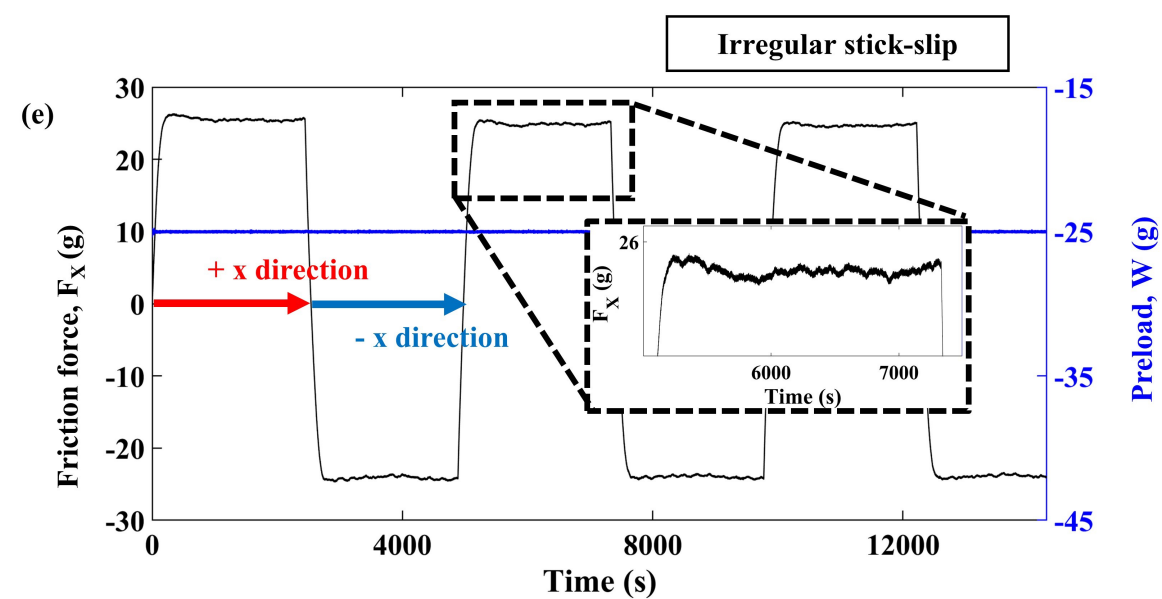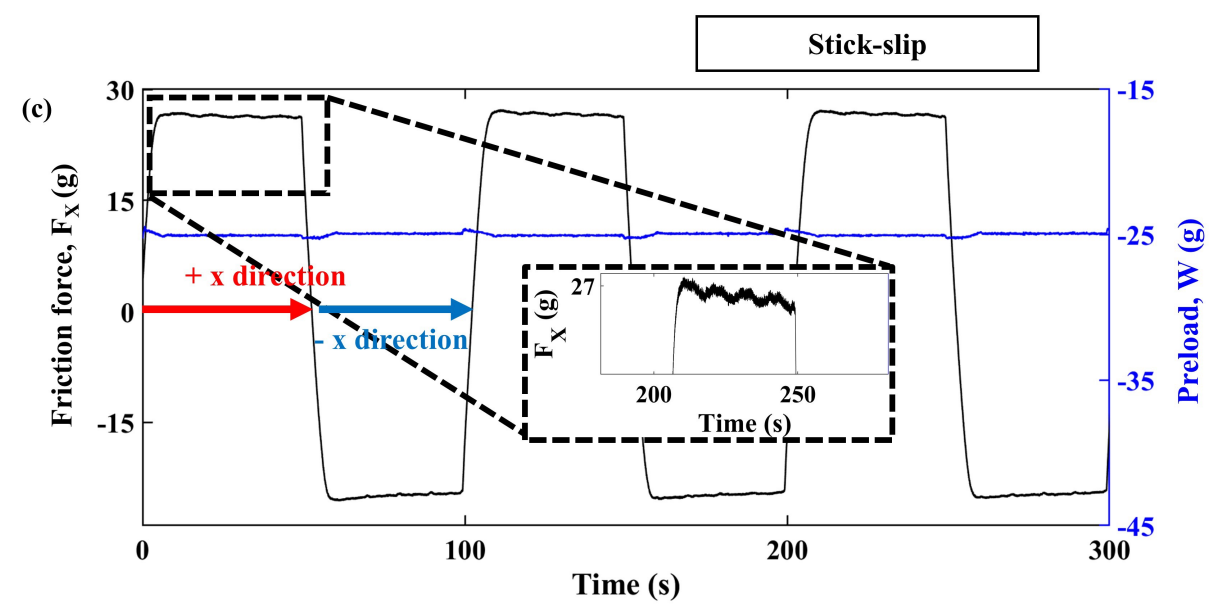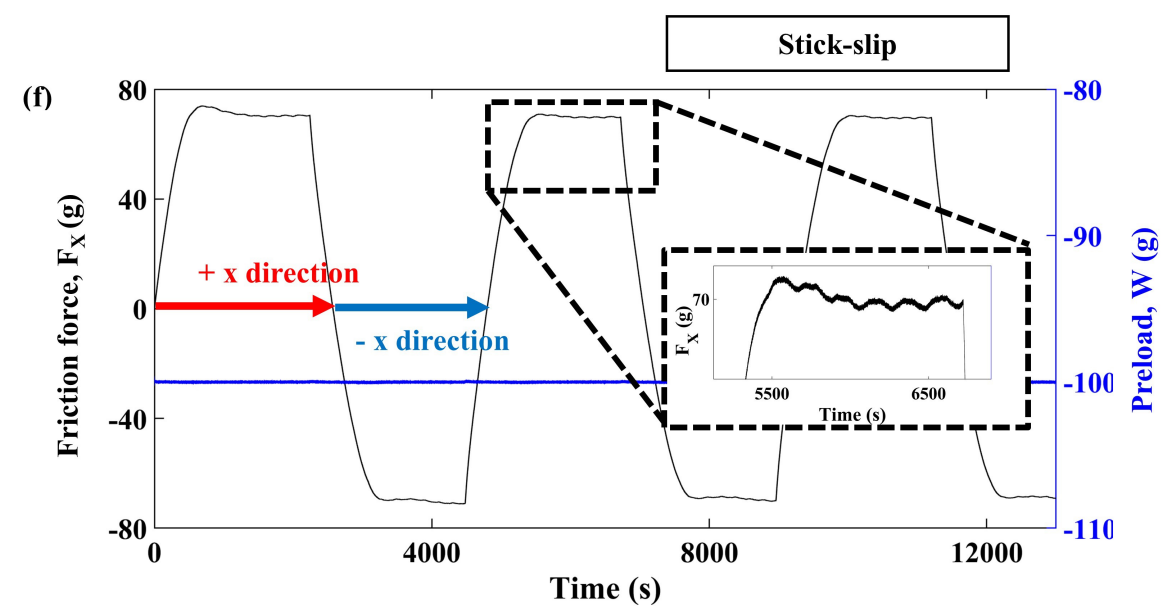

Supplement: d0sm00516a4.pdf [file d0sm00516a4.pdf]

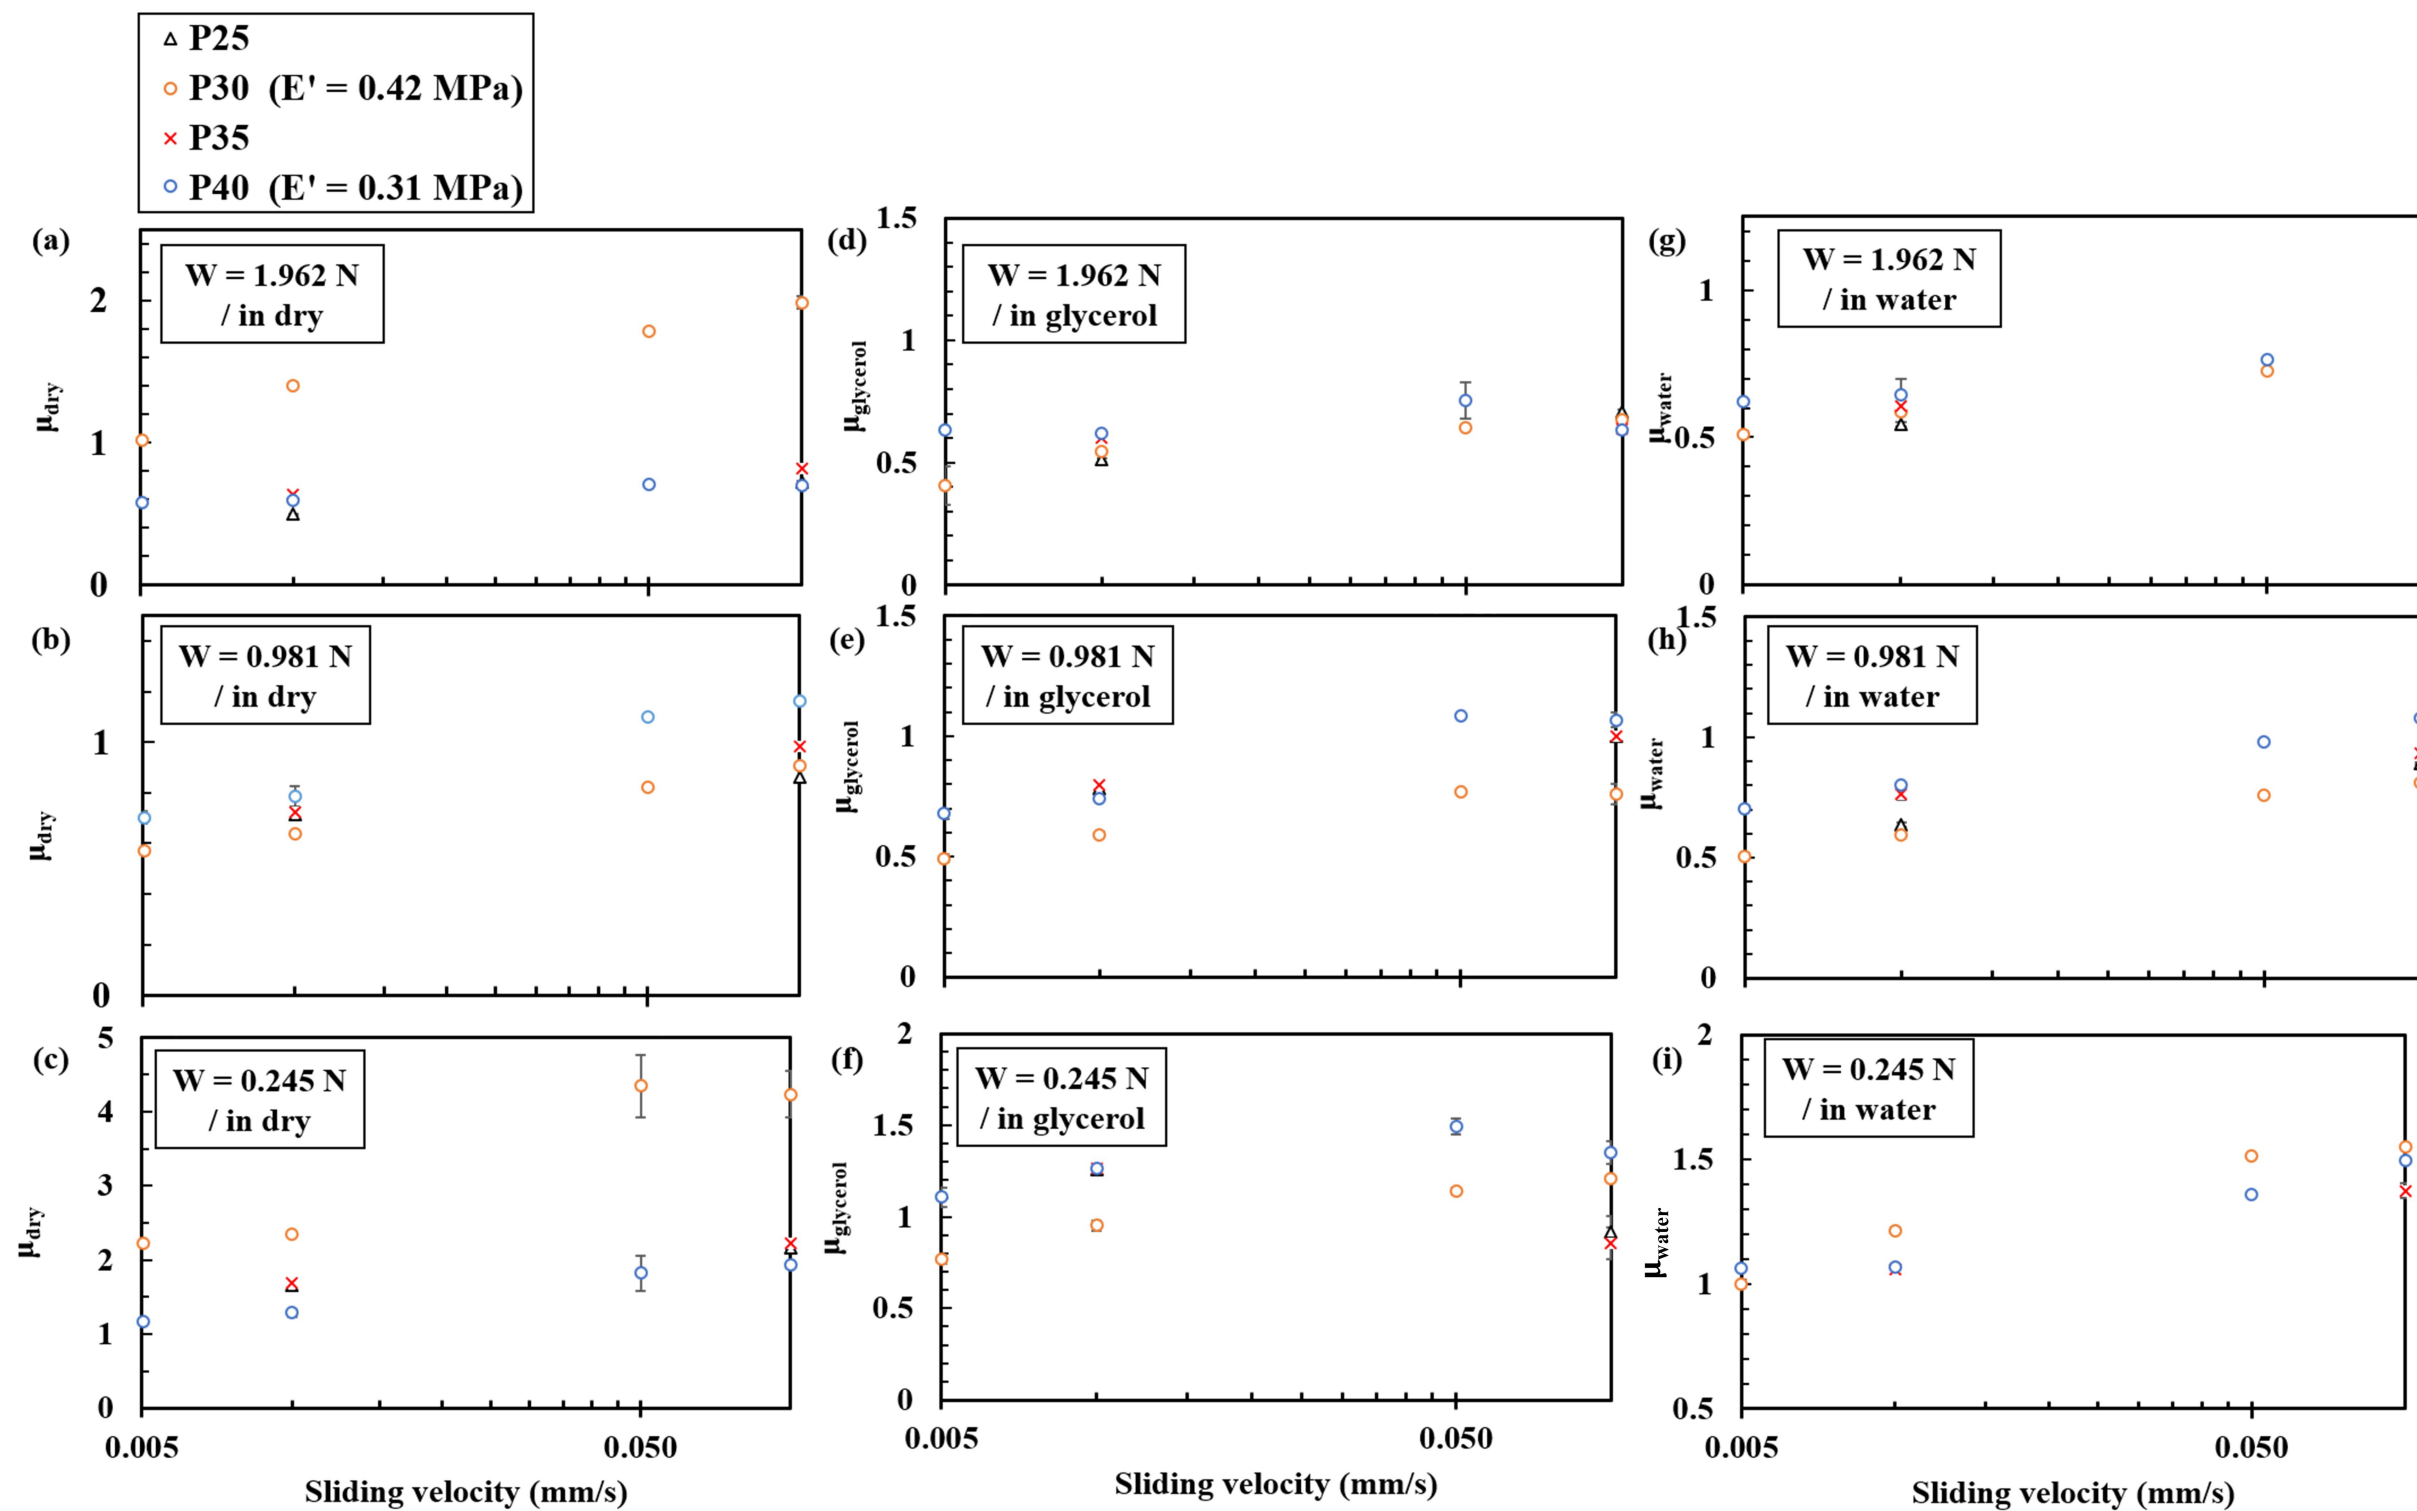

Supplement: d0sm00516a5.pdf [file d0sm00516a5.pdf]

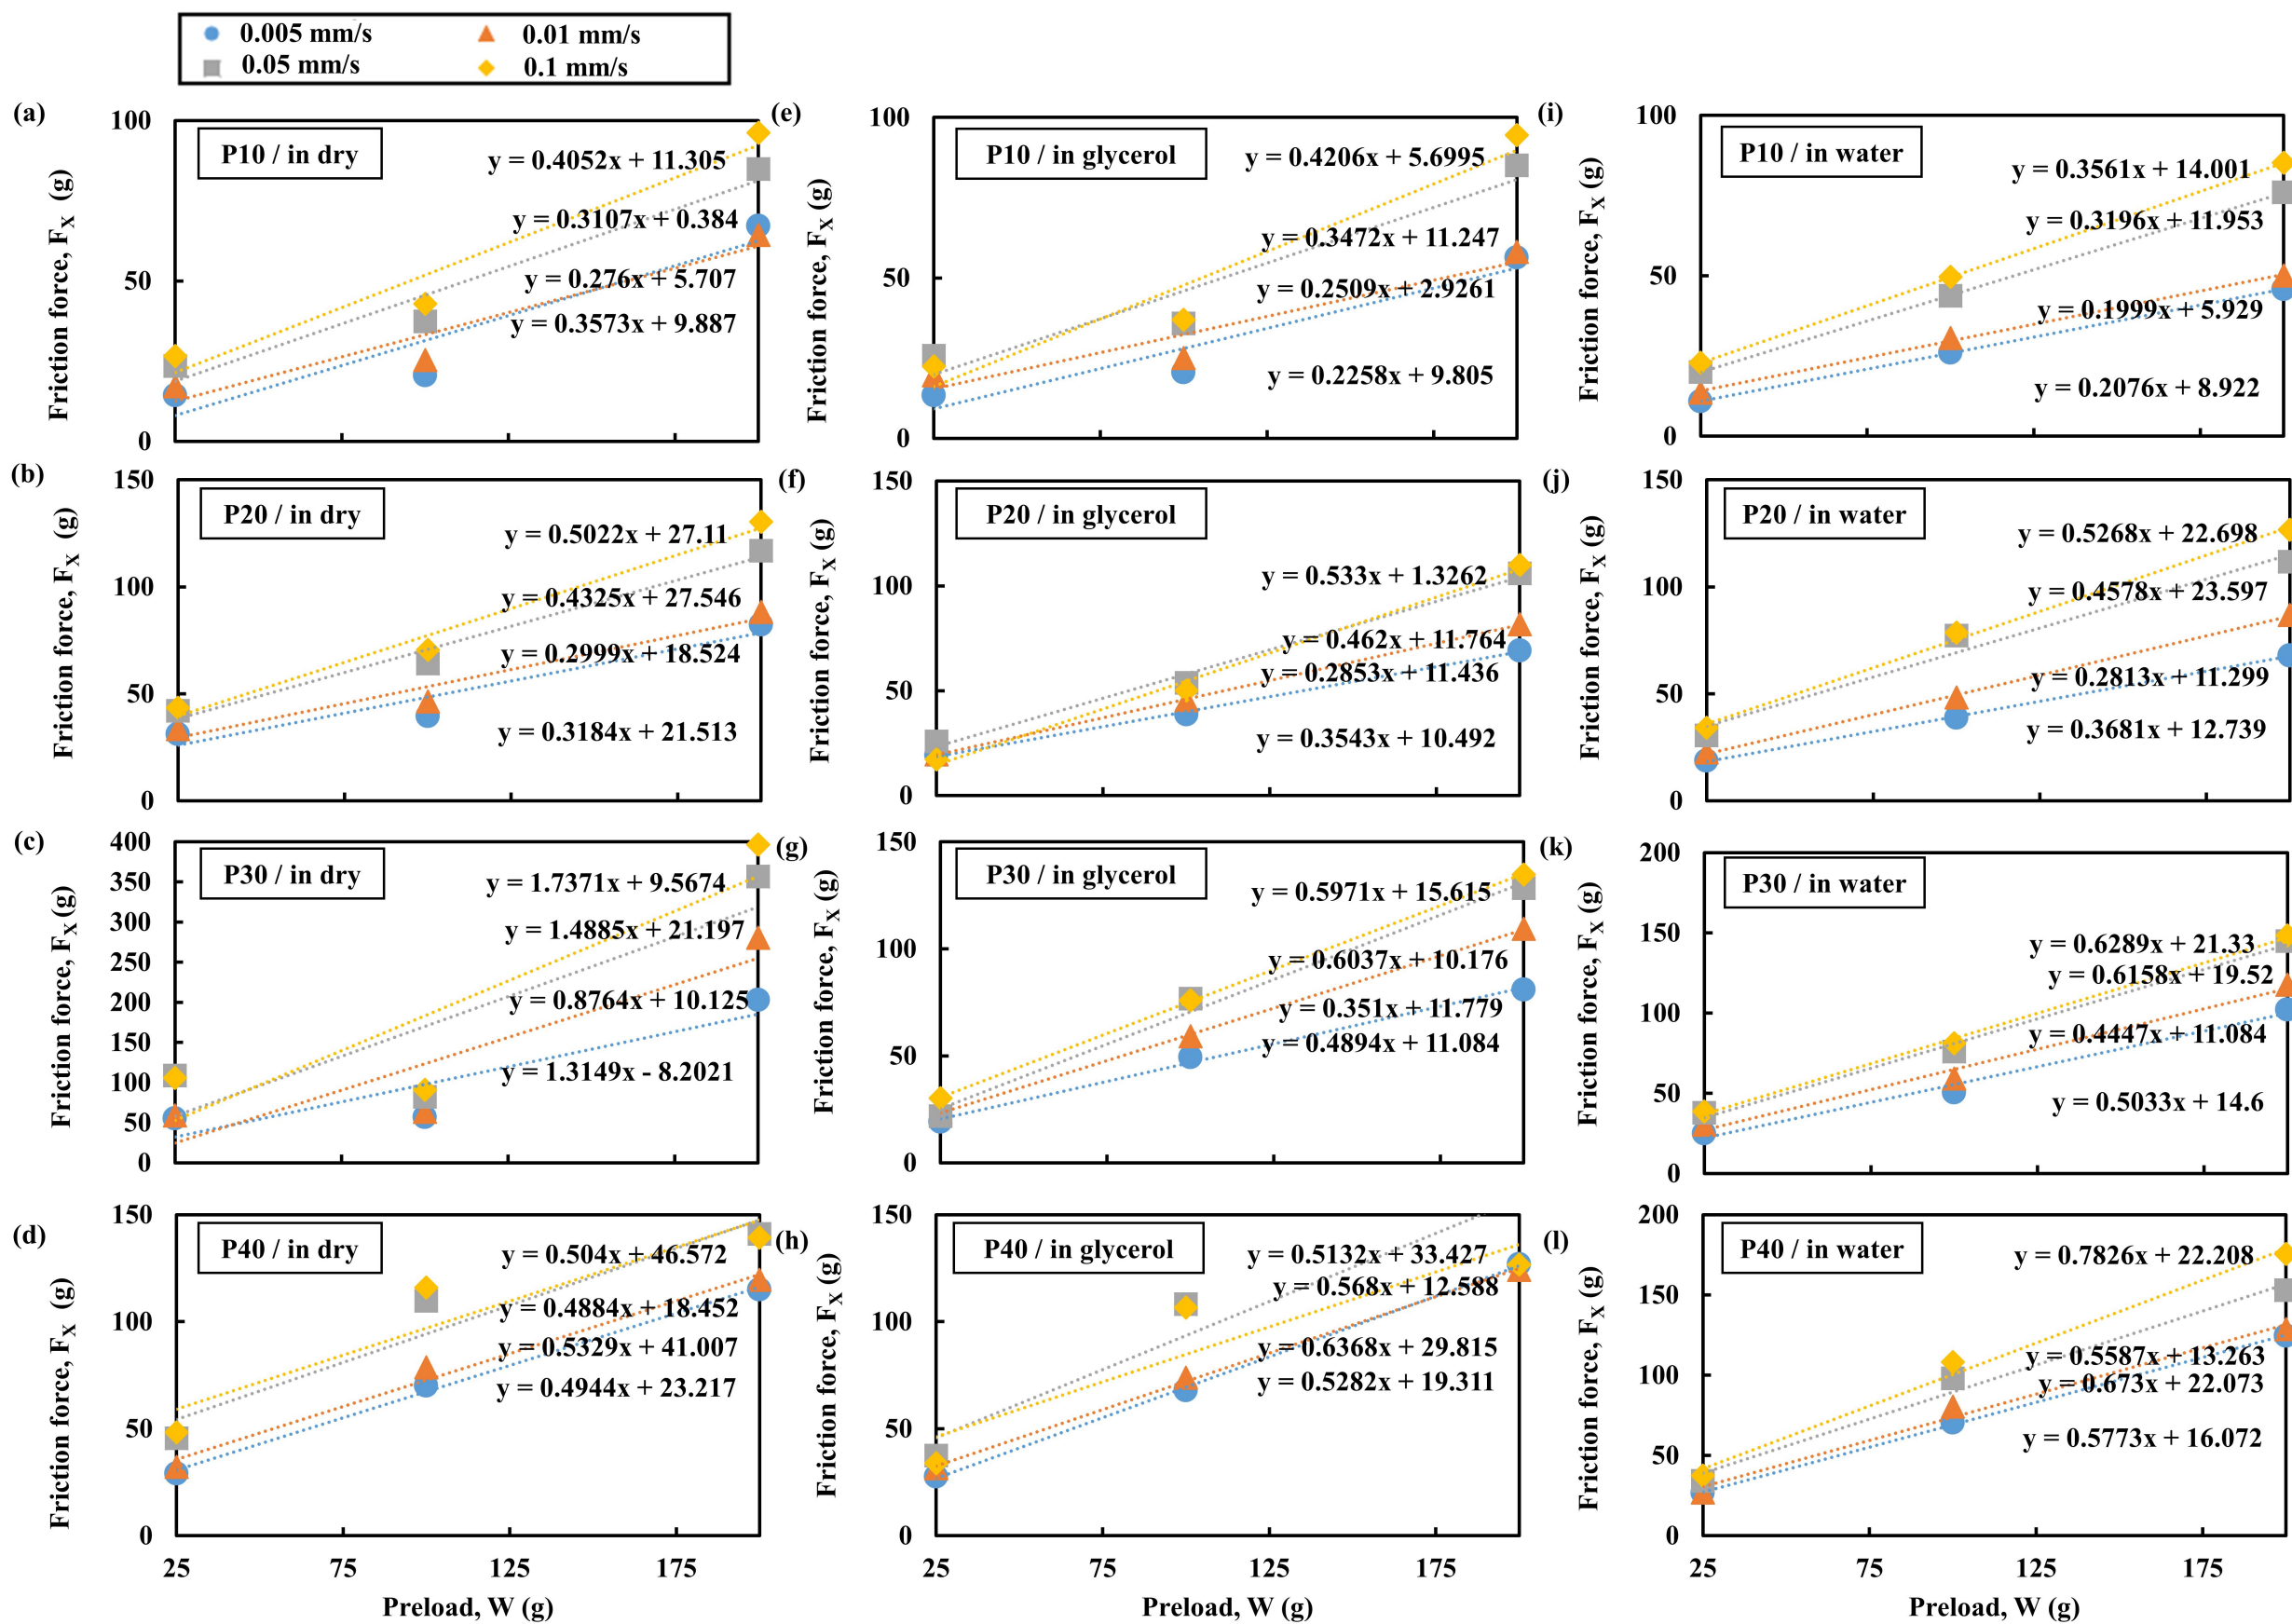

Supplement: d0sm00516a6.pdf [file d0sm00516a6.pdf]

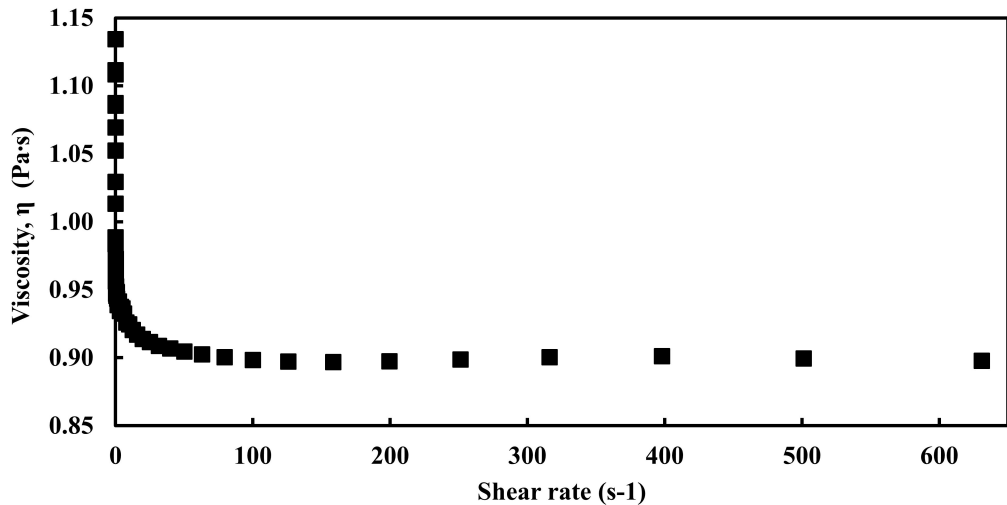

Supplement: d0sm00516a7.pdf [file d0sm00516a7.pdf]
